# Supplementary material
Source: publisher figshare collection journal article supplement (https://acs.figshare.com/ndownloader/files/7887355)
Supplement: Supplementary file 1 [file 7887355]

---

# **pH of Aerosols in a Polluted Atmosphere: Source Contributions to Highly Acidic Aerosol**

**Guoliang Shi <sup>†,§,\*</sup>, Jiao Xu <sup>†</sup>, Xing Peng <sup>†</sup>, Zhimei Xiao <sup>‡</sup>, Kui Chen <sup>‡</sup>,**

**Yingze Tian <sup>†</sup>, Xinbei Guan <sup>§</sup>, Yinchang Feng <sup>†</sup>, Haofei Yu <sup>§</sup>, Athanasios Nenes <sup>||</sup>,**

**Armistead G. Russell <sup>§,\*</sup>**

<sup>†</sup> State Environmental Protection Key Laboratory of Urban Ambient Air Particulate Matter Pollution Prevention and Control, College of Environmental Science and Engineering, Nankai University, Tianjin, 300071, China

<sup>‡</sup> Environmental Monitoring Center of Tianjin

<sup>§</sup> School of Civil and Environmental Engineering, Georgia Institute of Technology, Atlanta, Georgia 30332-0512

<sup>||</sup> Earth and Atmospheric Sciences, Georgia Institute of Technology, Atlanta, GA 30332

\*Corresponding Author: Phone: +86 22 23507962. Fax: +86 2223503397. E-mail: nksgl@nankai.edu.cn, ted.russell@gatech.edu

## **Summary**

**26 Pages, 11 Figures and 4 Tables**

**Figure S1.** Correlations between ammonium and nitrate plus sulfate (in equivalence units)

**Figure S2.** Relationship between AE (anion equivalent, mol m<sup>-3</sup>) and CE (cation equivalent, mol m<sup>-3</sup>)

**Figure S3.** Profiles of five sources extracted by ME2

**Figure S4.** Fitting plot of modeled concentration and measured concentration of WS-ions

**Figure S5.** Time variation of five sources during the sampling period

**Figure S6.** AE/CE-pH plots during heating and non-heating periods

**Figure S7.** CE (mol m<sup>-3</sup>) vs. pH levels (A), for the (B) heating and (C) non-heating periods

**Figure S8.** CE (mol m<sup>-3</sup>) vs. pH, colored bar shows the percentage source contribution (%)

**Figure S9.** [NO<sub>3</sub><sup>-</sup>] vs. pH. Colored bar shows the percentage source contribution (%)

**Figure S10.** Neutralization ratio ( $R_{neutral}$ ) vs. pH, colored bar shows the AE loading (anion equivalent, mol m<sup>-3</sup>)

**Figure S11.** AE (mol m<sup>-3</sup>) vs. pH, with colored bar water content (μg m<sup>-3</sup>), calculated by ISORROPIA

---

**Table S1.** Concentrations of WS-ions during the sampling period ( $\mu\text{g m}^{-3}$ )

**Table S2.** Regression information for AE and CE against source contributions ( $\mu\text{g m}^{-3}$ )

**Table S3.** Regression information for Neutralization ratio  $R_{neutral}$  against source contributions ( $\mu\text{g m}^{-3}$ )

**Table S4.** Regression information for  $\Delta\text{pH}$ , pH and  $10^{\text{pH}}$  against source contribution ( $\mu\text{g m}^{-3}$ )

**Concentrations and Existing Forms of WS-ions.** In this study, the hourly concentrations of total WS-ions species in the collected PM<sub>2.5</sub> samples ranged from 2.8 µg m<sup>-3</sup> to 401.9 µg m<sup>-3</sup> with an average level of 37.01 µg m<sup>-3</sup>. As shown in Table S1, ions with the highest average concentrations are ranked as: NO<sub>3</sub><sup>-</sup> (10.7 µg m<sup>-3</sup>), SO<sub>4</sub><sup>2-</sup> (8.9 µg m<sup>-3</sup>), NH<sub>4</sub><sup>+</sup> (6.9 µg m<sup>-3</sup>), Cl<sup>-</sup> (3.5 µg m<sup>-3</sup>), K<sup>+</sup> (1.3 µg m<sup>-3</sup>), F<sup>-</sup> (0.9 µg m<sup>-3</sup>), Na<sup>+</sup> (0.9 µg m<sup>-3</sup>), Ca<sup>2+</sup> (0.5 µg m<sup>-3</sup>) and Mg<sup>2+</sup> (0.1 µg m<sup>-3</sup>). Among them SO<sub>4</sub><sup>2-</sup>, NO<sub>3</sub><sup>-</sup> and NH<sub>4</sub><sup>+</sup> are the three dominant species, accounting for approximately 78% of total PM<sub>2.5</sub> mass, a similar percentage also found in other studies<sup>1</sup>. The average concentrations of Cl<sup>-</sup>, F<sup>-</sup>, NO<sub>2</sub><sup>-</sup>, Mg<sup>2+</sup>, K<sup>+</sup>, Na<sup>+</sup> and Ca<sup>2+</sup> together account for 22% of the measured WS-ions concentrations.

Concentration variations (µg m<sup>-3</sup>) of the three dominant components (NH<sub>4</sub><sup>+</sup>, SO<sub>4</sub><sup>2-</sup> and NO<sub>3</sub><sup>-</sup>) are shown in Figure. 1. NH<sub>4</sub><sup>+</sup> is the dominant cation component, with an average concentration value of 6.9 µg m<sup>-3</sup>. During the sampling period, average NH<sub>4</sub><sup>+</sup> concentrations are higher in heating period (8.7 µg m<sup>-3</sup>) than non-heating period (4.8 µg m<sup>-3</sup>). The seasonal trends of the other two major ions, NO<sub>3</sub><sup>-</sup> and SO<sub>4</sub><sup>2-</sup>, are similar with NH<sub>4</sub><sup>+</sup>, with average concentration levels higher in heating period (13.5 µg m<sup>-3</sup> and 10.2 µg m<sup>-3</sup>, respectively), and lower in summer time (non-heating period, 7.6 µg m<sup>-3</sup> and 7.4 µg m<sup>-3</sup>, respectively). Temporal concentration variations of dominant WS-ions in this study are consistent with results from other studies. For example, Zhang et al. (2011) found that the above mentioned three major species accounted for 82% of total WS-ions concentrations, and NO<sub>3</sub><sup>-</sup> and NH<sub>4</sub><sup>+</sup>

23 concentrations peak in winter and are lower in spring<sup>1</sup>.

24

25 Nitrate and sulfate are the two major anion components in Tianjin during the  
26 sampling period. Studies have shown that particulate nitrate is formed through the  
27 photo-oxidation of NO<sub>2</sub> emitted from fossil fuels combustion<sup>1, 2, 3</sup>, and sulfate can be  
28 formed by the oxidization of SO<sub>2</sub> through heterogeneous or homogeneous reactions<sup>4</sup>,  
29 <sup>5</sup>. Ammonium is the dominant cation in the collected particulate matter. The most  
30 possible solute species in this study include ammonium chloride (NH<sub>4</sub>Cl),  
31 ammonium nitrate (NH<sub>4</sub>NO<sub>3</sub>) and ammonium sulfate ((NH<sub>4</sub>)<sub>2</sub>SO<sub>4</sub>). Studies showed  
32 that ammonium chloride is the most volatile among the three; ammonium nitrate is  
33 thermally instable; and ammonium sulfate is the most stable. Thus, ammonium  
34 preferably bind with sulfate first, then nitrate, followed by other anions such as  
35 nitrite or chloride<sup>6, 7, 8, 9</sup>.

36

37 The formation of (NH<sub>4</sub>)<sub>2</sub>SO<sub>4</sub> and NH<sub>4</sub>NO<sub>3</sub> are influenced by concentrations of  
38 participating species as well as atmospheric conditions such as temperature and  
39 relative humidity. Plots of ammonium and sulfate & nitrate (in equivalent unit) are  
40 provided in Figure. S1. A close to 1 ratio of ammonium equivalents to nitrate and  
41 sulfate equivalents ( $E_{\text{ammonium}}/E_{\text{nitrate+sulfate}}$ ) suggests that all of the ammonium ions  
42 might be neutralized by sulfate and nitrate ions, indicating the predominance of  
43 ammonium sulfate ((NH<sub>4</sub>)<sub>2</sub>SO<sub>4</sub>) and ammonium nitrate (NH<sub>4</sub>NO<sub>3</sub>) as ammonium salt  
44 in particulate matter<sup>10, 11</sup>. A larger than 1 ratio indicating the existence of other

45 ammonium salts in addition to ammonium sulfate and ammonium nitrate; and a  
46 lower than 1 ratio may be due to that all of the ammonium were neutralized by  
47 sulfate and nitrate, and other sulfate salt or nitrate salt may also exist. Figure. S1 also  
48 illuminates correlation plots of  $E_{\text{ammonium}}$  against  $E_{\text{nitrate+sulfate}}$  for different seasons  
49 (heating and non-heating season). The plots were separated into two groups  
50 manually, one is the ratios higher than 1, the other group is the ratios lower than 1  
51 (Figure. S1). Overall, ammonium fractions are higher in heating than non-heating  
52 period. Although, in a small number of days in the heating period, ammonium  
53 concentrations are not as high, which may be due to special source contributions  
54 and/or meteorological conditions.

55

56 **Source Analysis for WS-ions.** As shown in Figure. S2, the AE-CE plots for two  
57 periods show different patterns, suggest different emission source contributions of  
58 WS-ions in the two periods. To further investigate this issue, the hourly online  
59 measurement dataset ( $2971 \times 12$ : 2971 samples and 12 species) were analyzed by  
60 ME2 to identify potential sources. The dataset contains mass concentrations of all  
61 particulate ion components ( $\text{NH}_4^+$ ,  $\text{Na}^+$ ,  $\text{K}^+$ ,  $\text{Ca}^{2+}$ ,  $\text{Mg}^{2+}$ ,  $\text{SO}_4^{2-}$ ,  $\text{NO}_3^-$ ,  $\text{Cl}^-$ ) as well as  
62 gaseous pollutants ( $\text{SO}_2$ ,  $\text{NO}_2$ ,  $\text{CO}$ ). Concentrations of  $\text{SO}_2$  and  $\text{NO}_2$  were down  
63 weighted (by a factor of 100) to reduce their impacts on factor profiles. Five factors  
64 were extracted from the ME2 modeling, with a Q value of 22515 ( $Q_{\text{main}} = 21208$ ,  
65  $Q_{\text{aux}} = 1307$ ,  $Q_{\text{aux}}/Q_{\text{main}} = 6\%$ ), which is close to the theoretical Q value ( $20737$ :  
66  $2971 \times 12 - 5 \times (2971 + 12)$ ), indicated satisfactory model performance. Generally,

67  $Q_{aux}$  indicates the residual error which caused by factor pulling, the ratio of  $Q_{aux}/$   
68  $Q_{main}$  can indicate the uncertainties involved in factor pulling. A ratio less than 15%  
69 is desirable.

70

71 The extracted source profiles are shown in Figure. S3. Factor 1 showed high  
72 loadings for  $Cl^-$ ,  $NH_4^+$ , and  $SO_2$ . According to previous studies,  $Cl^-$  was an important  
73 marker of coal combustion<sup>9, 12, 13</sup>. In the study region, coal combustions are also  
74 accompanied by emissions of  $SO_2$ . Therefore, this factor was identified as coal  
75 combustion source.

76

77 Factor 2 was weighted by  $Ca^{2+}$ ,  $Mg^{2+}$ , which were considered as markers of mineral  
78 dust, hence this factor was identified as mineral dust source<sup>14</sup>. It is known that  
79 mineral dusts may come from both natural origin (natural soil dust) and human  
80 activities (e.g. road dust and construction dust). It should be noted that, during the  
81 study period, the city of Tianjin has an overall construction area of 215.2 million  $m^2$ ,  
82 concentrated in urbanized regions. Similar results can also be found in other studies  
83 such as Song et al. (2006)<sup>15</sup>, who found that mineral dust source contribute  
84 significantly to ambient  $PM_{2.5}$  in northern China.

85

86 Factor 3 show high loadings of  $NO_2$  and  $CO$ , which are likely to be emitted by  
87 vehicles. Therefore, this factor was identified as vehicle exhaust source<sup>14, 16, 17</sup>. As of  
88 2014, the total vehicle population in Tianjin has reached 2.88 million, which ranked

89 seventh place in China according to Tianjin Statistical Yearbook (2015)<sup>18</sup>. This  
90 enormous vehicle fleet emitted large amount of secondary PM precursors such as  
91 SO<sub>2</sub> and NO<sub>x</sub>, which triggers significant regulatory concerns.

92

93 Factor 4 shows high loadings for NO<sub>3</sub><sup>-</sup> and NH<sub>4</sub><sup>+</sup>, which can be identified as  
94 secondary nitrate source. Factor 5 is weighted by SO<sub>4</sub><sup>2-</sup> and NH<sub>4</sub><sup>+</sup>, and was treated as  
95 secondary sulfate source. It is well acknowledged the formations of secondary nitrate  
96 and sulfate sources are contributed by their gaseous precursors species such as NO<sub>x</sub>  
97 and SO<sub>2</sub><sup>19, 20</sup>, which are emitted from vehicles, fossil fuel, coal combustion and  
98 industry process<sup>21</sup>. As one of the largest cities in China, Tianjin has great numbers of  
99 gaseous precursor sources, including heavy traffic emissions, large amount of coal  
100 combustion activities as well as many industrial factories. According to Tianjin  
101 Statistical Yearbook (2015)<sup>18</sup>, annual emissions of SO<sub>2</sub> and NO<sub>x</sub> in Tianjin are close  
102 to half million tons in 2014. These large amount of emissions of precursors are likely  
103 to contribute to the formation of secondary sulfate and nitrate sources.

104

105 To assess the performance of the ME2 model, the model estimated PM<sub>2.5</sub>  
106 concentrations were compared with measured PM<sub>2.5</sub> mass concentrations. The  
107 estimated mass concentrations of PM<sub>2.5</sub> were calculated according to Eq (S1):

108 
$$Mass_i = \sum_{p=1}^P Con_{pi} \quad (S1)$$

109 where, Mass<sub>i</sub> is the estimated PM<sub>2.5</sub> concentration of the *i*th sample; Con<sub>pi</sub> is the

110 estimated contribution (by ME2) of the  $p$ th sources to receptor in the  $i$ th sample; and  
111  $P$  is the total number of extracted source categories.

112

113 The fitting plot between measured and estimated  $PM_{2.5}$  concentrations is shown in  
114 Figure. S4 (three outlier point were removed). The regression intercept is 0.00 and  
115 the Pearson correlation coefficient is 0.99, indicates that the estimated  $PM_{2.5}$   
116 concentrations for most samples are close to measurement and the modeling results  
117 are satisfactory.

118

119 **Impact of Sources on AE and CE.** Source impact on WS-ions levels was analyzed  
120 using regression source contribution against AE (1), CE, pH, and Neutralization ratio  
121 ( $R_{neutral}$ ) (Additional details are provided in Table S2 and S3).

122

123 AE was used as the dependent variable for regression in consideration of the linear  
124 relationship between source contributions and AE. The equation is:

$$125 \quad AE = -0.036 + 0.017 \text{ Coal} + 0.010 \text{ Dust} + 0.017 \text{ Vehicle} + 0.014 \text{ SN} + 0.012 \text{ SS} \quad (S2)$$

126 where SN is secondary nitrate and SS is secondary sulfate. This equation has an  $R^2$   
127 of 0.93, indicating a linear fit. Detailed information regarding the regression are  
128 provided in Table S2. Dust has a slightly lower regression coefficient compared to  
129 other sources, which is consistent with results from other studies<sup>22, 23</sup>.

130 Similarly, CE was also regressed with source contributions ( $R^2 = 0.92$ ):

$$131 \quad CE = 0.074 + 0.018 \text{ Coal} + 0.012 \text{ Dust} + 0.0044 \text{ Vehicle} + 0.0068 \text{ SN} + 0.018 \text{ SS} \quad (S3)$$



132 As expected, both coal and dust contribute strongly to CE, as does secondary sulfate,  
133 a finding can be explained by the association between  $\text{NH}_4^+$  and the factor (Figure.  
134 S3).

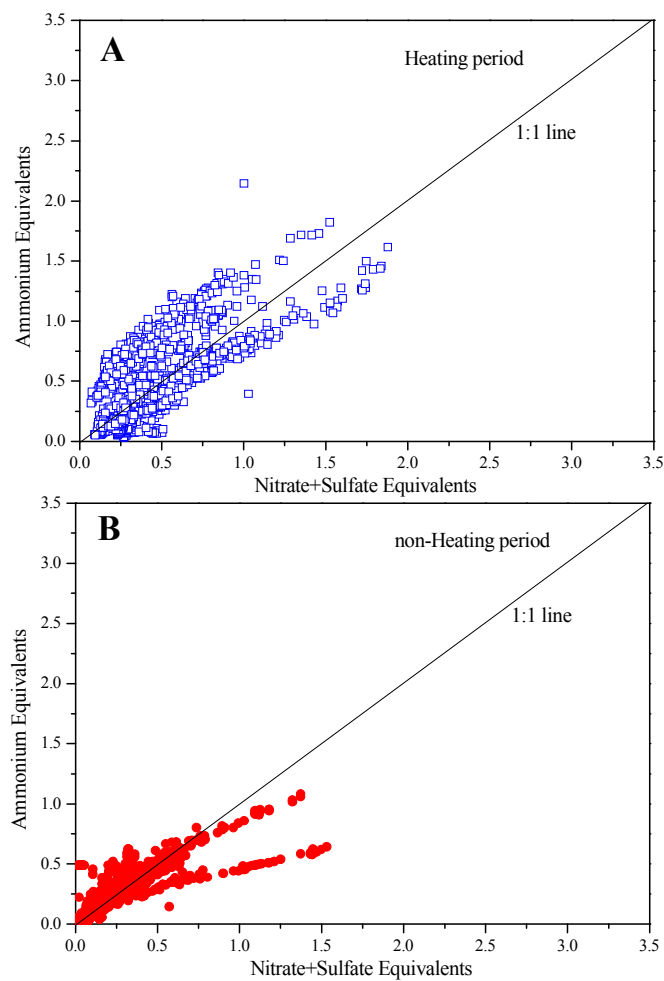

135  
136 **Figure S1.** Relationships between ammonium vs. nitrate plus sulfate (in equivalence  
137 units) for the (a) heating and (b) non-heating periods.  
138

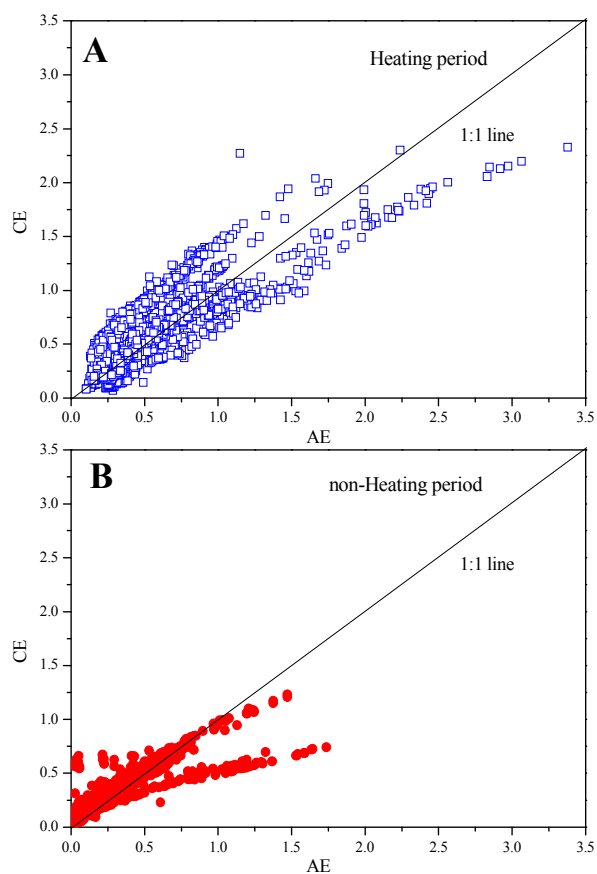

**Figure S2.** Relationship between AE (anion equivalent,  $\text{mol m}^{-3}$ ) and CE (cation equivalent,  $\text{mol m}^{-3}$ ) for (A) Heating period and (B) non-heating period. During the heating period, there are two branches: a relatively larger branch under the 1:1 line and another branch above the line; Similar pattern can also be found for the non-heating period, with one group relatively closer to the 1:1 line, and the other group above the 1:1 line. The average AE/CE ratio for all samples is 0.97.

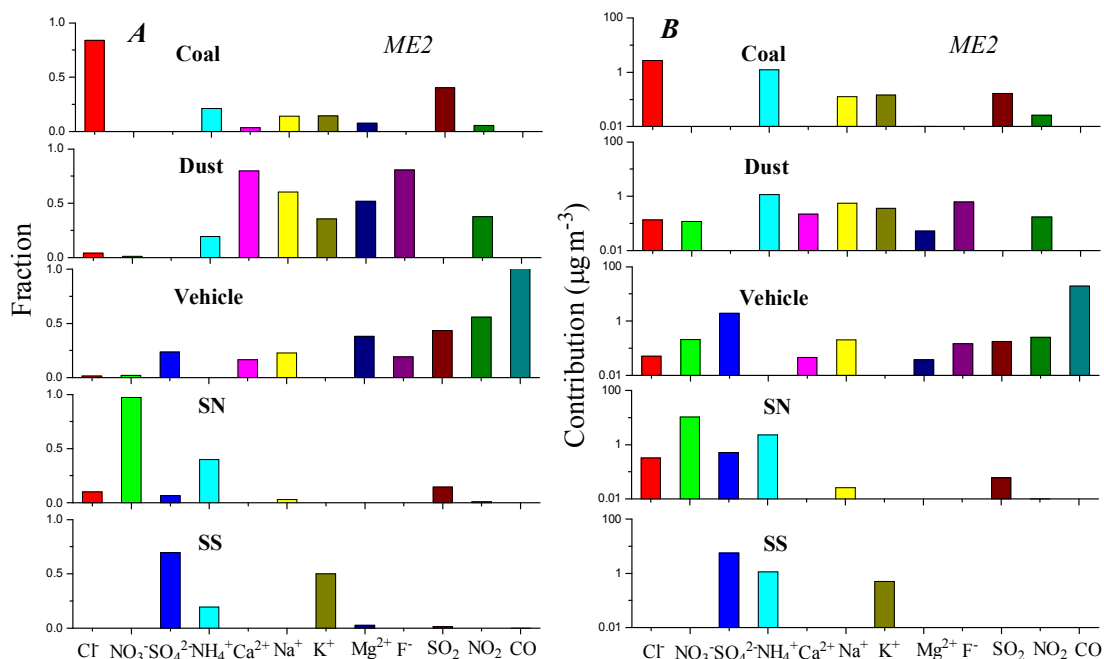

**Figure S3.** Profiles of five sources extracted by ME2.

**A: Species Fraction**

The fraction is the proportion of  $i$ th species from one factor to the total mass of  $i$ th species in the ambient, which can be calculated as:

$$fraction_{jp} = c_{jp} / c_j^*$$

where  $fraction_{jp}$  is the proportion of  $j$ th species from one factor to the total mass of  $p$ th species in the ambient;  $c_{jp}$  is the contribution ( $\mu\text{g m}^{-3}$ ) of  $j$ th species from  $p$ th factor calculated by ME2;  $c_j^*$  is the concentration ( $\mu\text{g m}^{-3}$ ) of  $j$ th species in this ambient.

**B: Species Contribution**

The Species Contribution is the contribution ( $\mu\text{g m}^{-3}$ ) of individual species from each source. Note: the contributions for  $\text{SO}_2$ ,  $\text{NO}_2$  and  $\text{CO}$  were the values (bar shown in Figure S3A)  $\times 100$

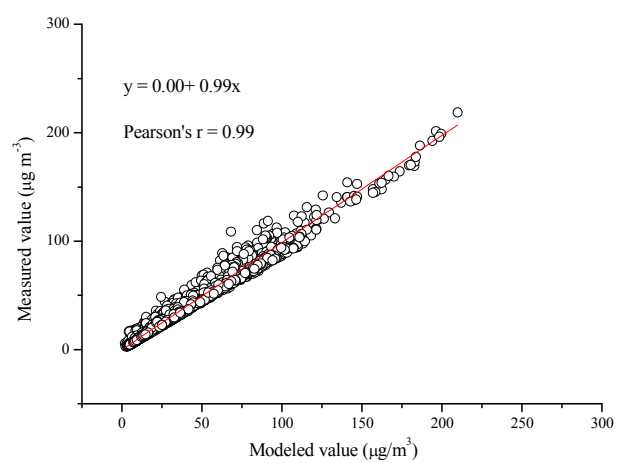

**Figure S4.** Fitting plot of modeled concentration and measured concentration of WS-ions. The regression intercept is 0.00 and the Pearson correlation coefficient is 0.99.

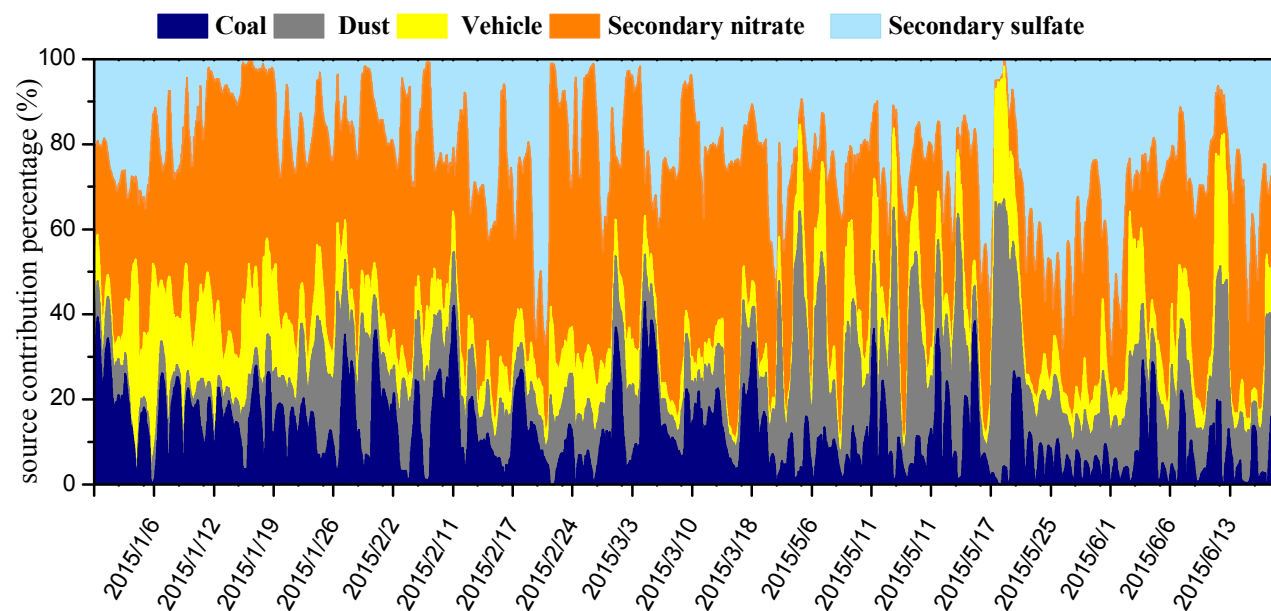

**Figure S5.** Time variation of five sources during the sampling period. The secondary nitrate factor represents the largest contribution, 41%, to total WS-ions; the second largest contributor is secondary sulfate (26%), followed by coal combustion (14%), mineral dust (11%) and vehicle exhaust source 9%.

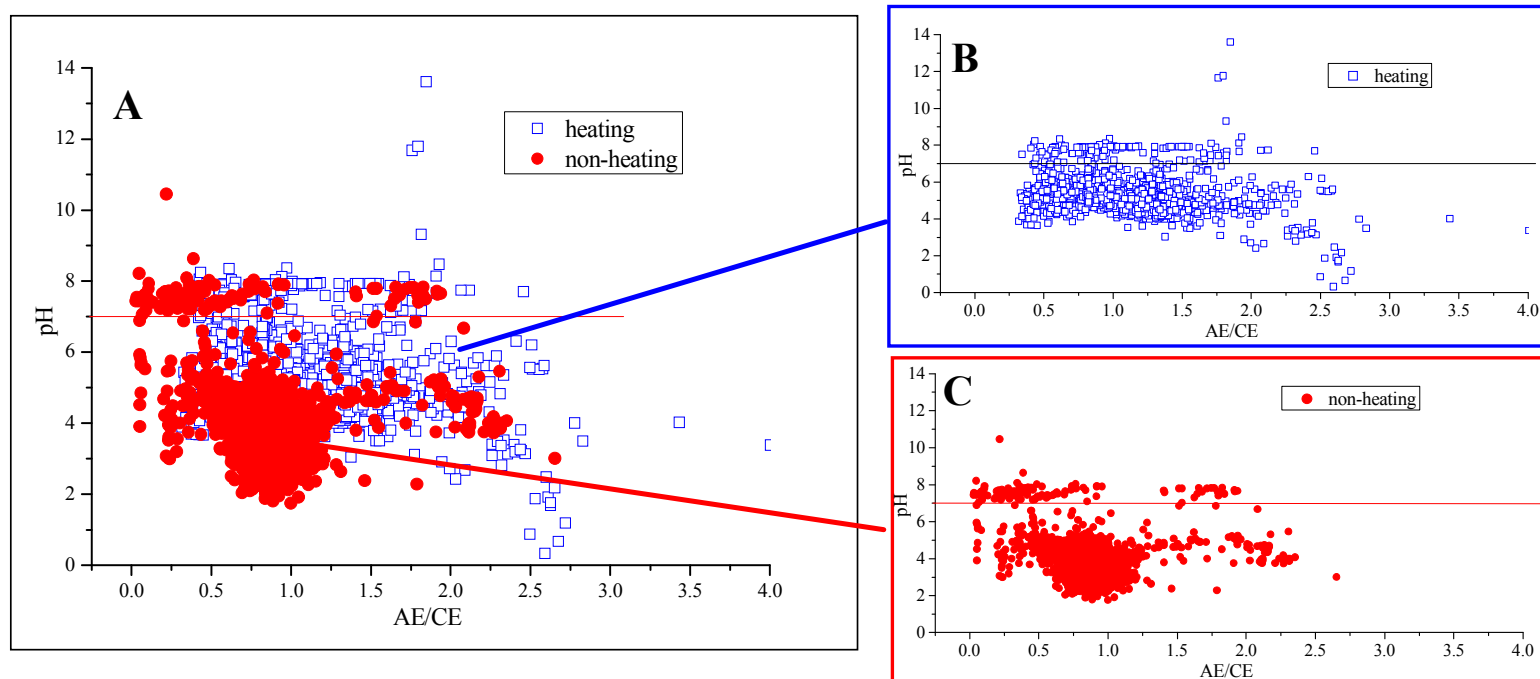

**Figure S6.** AE/CE-pH plots during heating and non-heating periods (A). AE/CE-pH relationships for both heating (B) and non-heating period (C) overlapped and show generally negative slopes. Such results are expected since high AE/CE ratios lead to lower pH values and low AE/CE ratios lead to higher pH values.

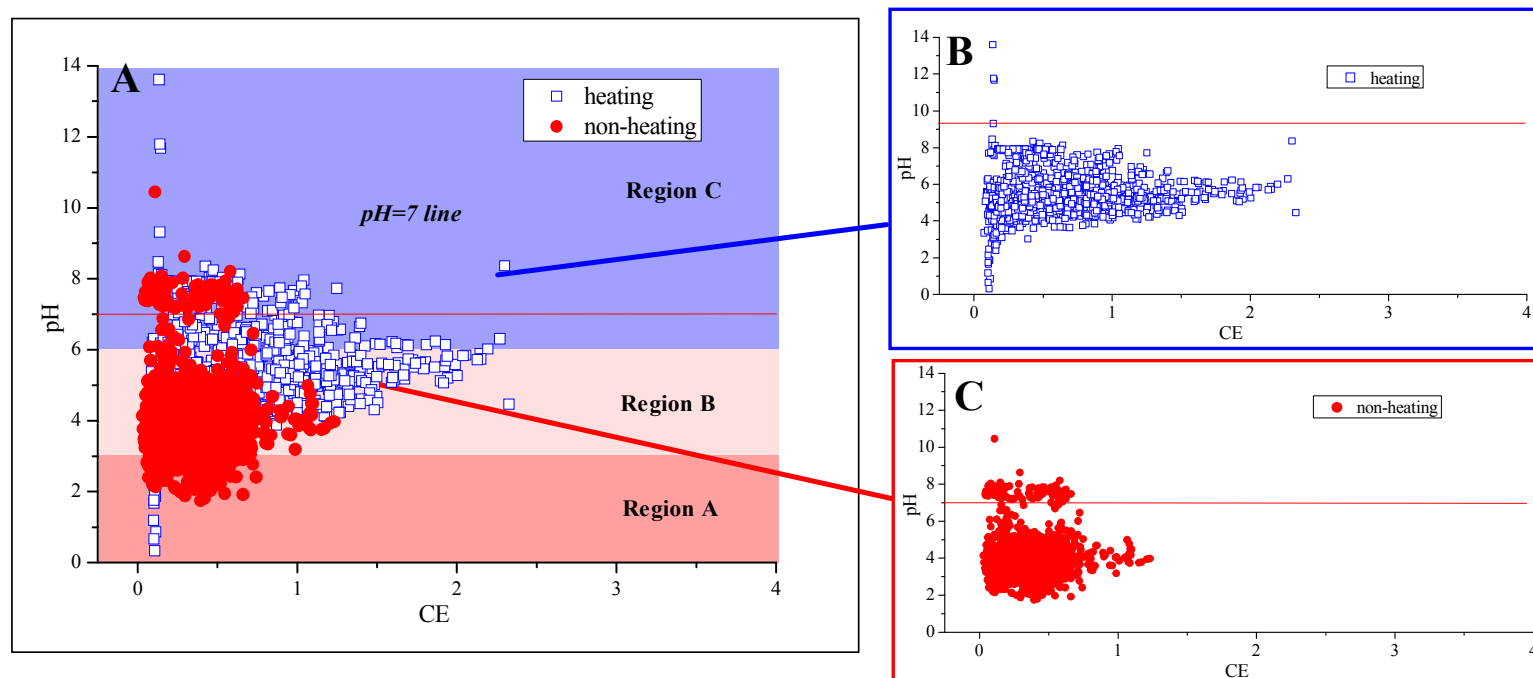

**Figure S7.** CE (mol m<sup>-3</sup>) vs. pH levels (A), for the (B) heating and (C) non-heating periods. Region A (pH < 3, low pH region), Region B (3 < pH < 6, moderately low-pH ) and Region C (pH > 6)

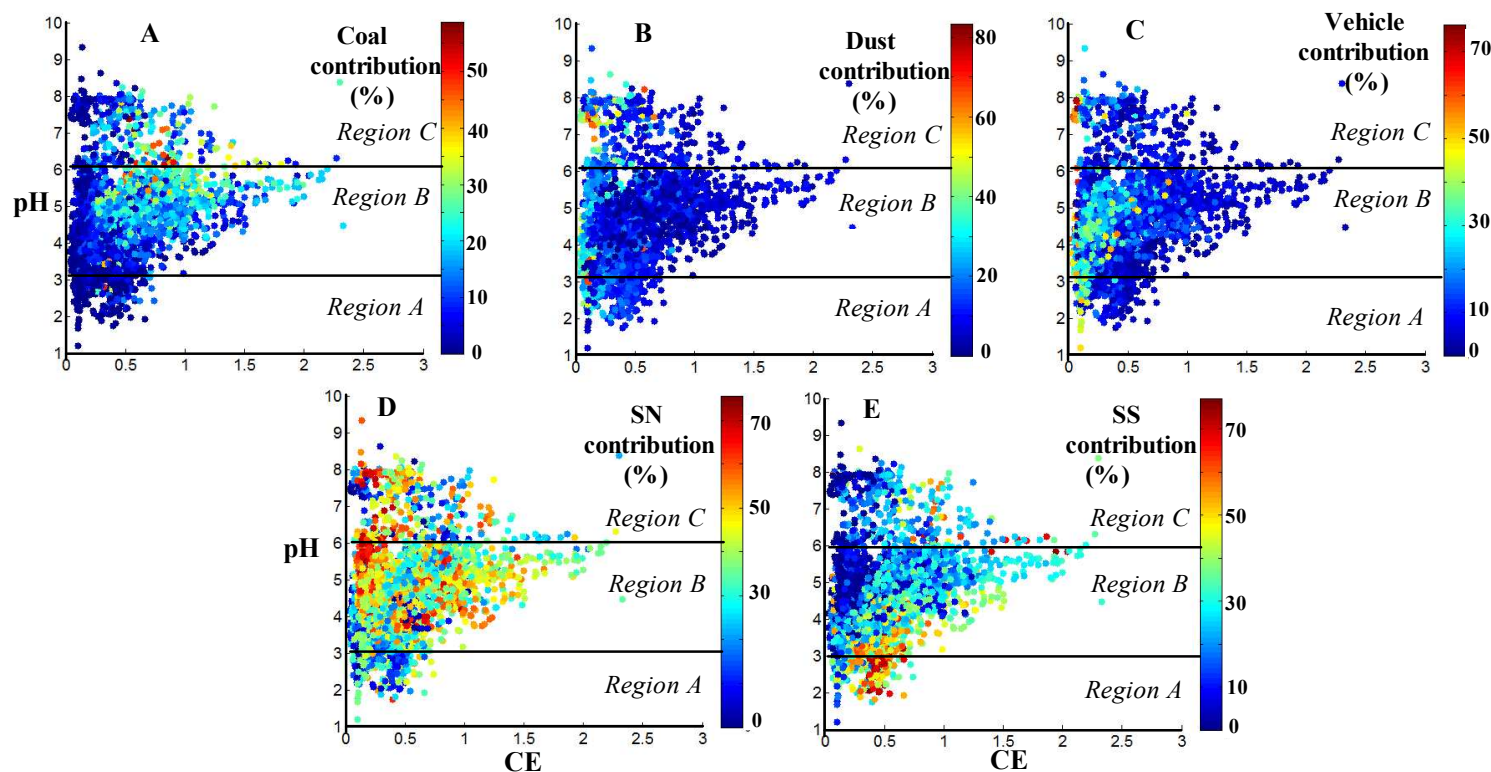

**Figure S8.** CE (mol m<sup>-3</sup>) vs. pH, colored bar shows the percentage source contribution (%) for (A) Coal combustion, (B) Dust, (C) Vehicles, (D) Secondary nitrate (SN) and (E) Secondary sulfate (SS). For the purpose of discussion, the ranges of pHs were divided into three regions: Region A (pH < 3, low pH region), Region B (3 < pH < 6, moderately low-pH ) and Region C (pH > 6 is more neutral and alkaline). The contribution ( $= (S_i / S_{\text{sum}} \times 100\%)$ ) is the percentage contribution (%) of *i*'th source category to the sum of the source impacts on water soluble ions.



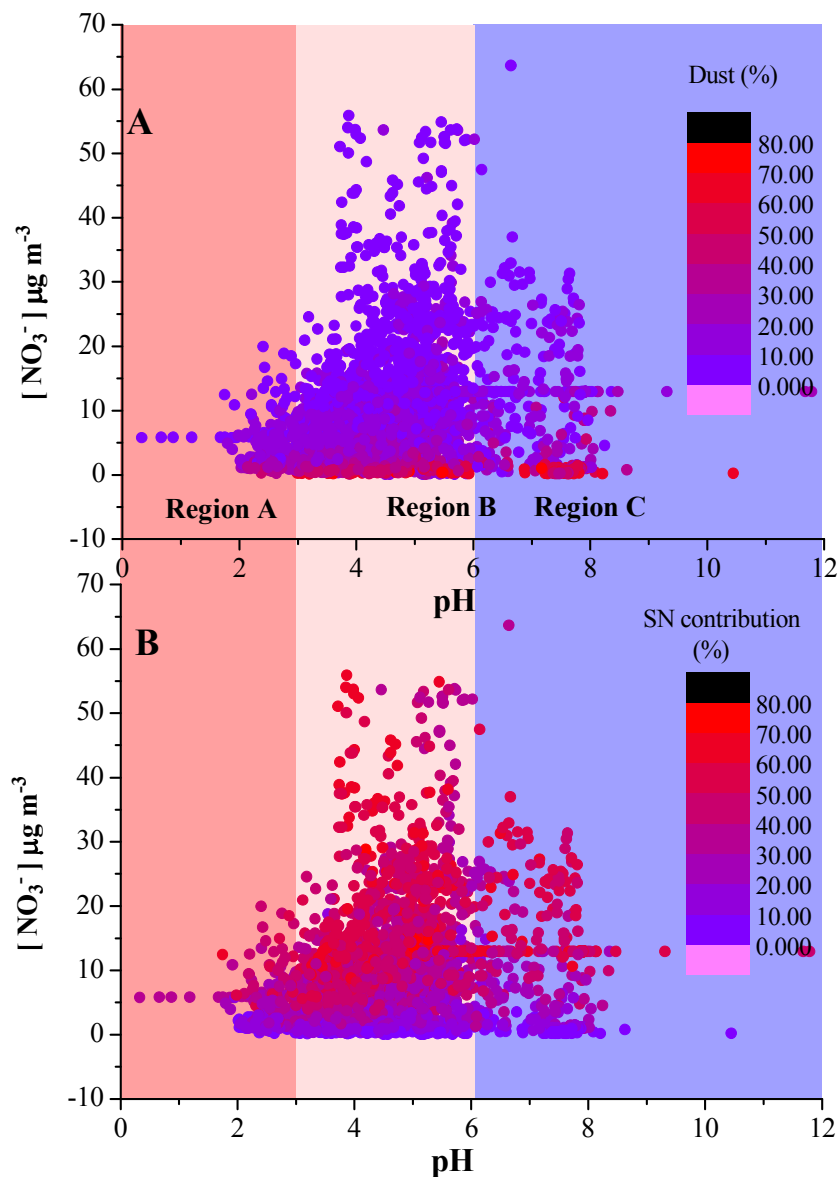

**Figure S9.**  $[\text{NO}_3^-]$  vs. pH. Colored bar shows the percentage source contribution (%) for (A) Dust and (B) SN (secondary nitrate). In the low-pH region, most of the  $\text{NO}_3^-$  levels are low while in Region B,  $\text{NO}_3^-$  significantly increased with pH. In the high-pH region,  $\text{NO}_3^-$  decreases while pH increases, which is linked to the samples in this region being rich in mineral dust. Region A (pH < 3, low pH region), Region B (3 < pH < 6, moderately low-pH) and Region C (pH > 6 is more neutral and alkaline). The contribution  $(= (S_i/S_{\text{sum}} \times 100\%))$  is the percentage contribution (%) of  $i$ 'th source category to the sum of the source impacts on water soluble ions.

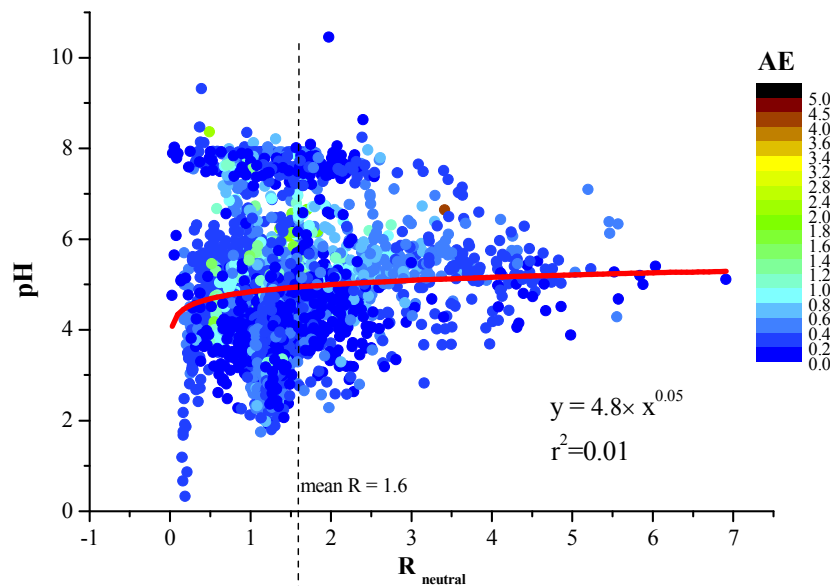

**Figure S10.** Neutralization ratio ( $R_{neutral}$ ) vs. pH, colored bar shows the AE loading (anion equivalent,

$$\text{mol m}^{-3}), R_{neutral} = [\text{NH}_4^+] / (2[\text{SO}_4^{2-}] + [\text{NO}_3^-]).$$

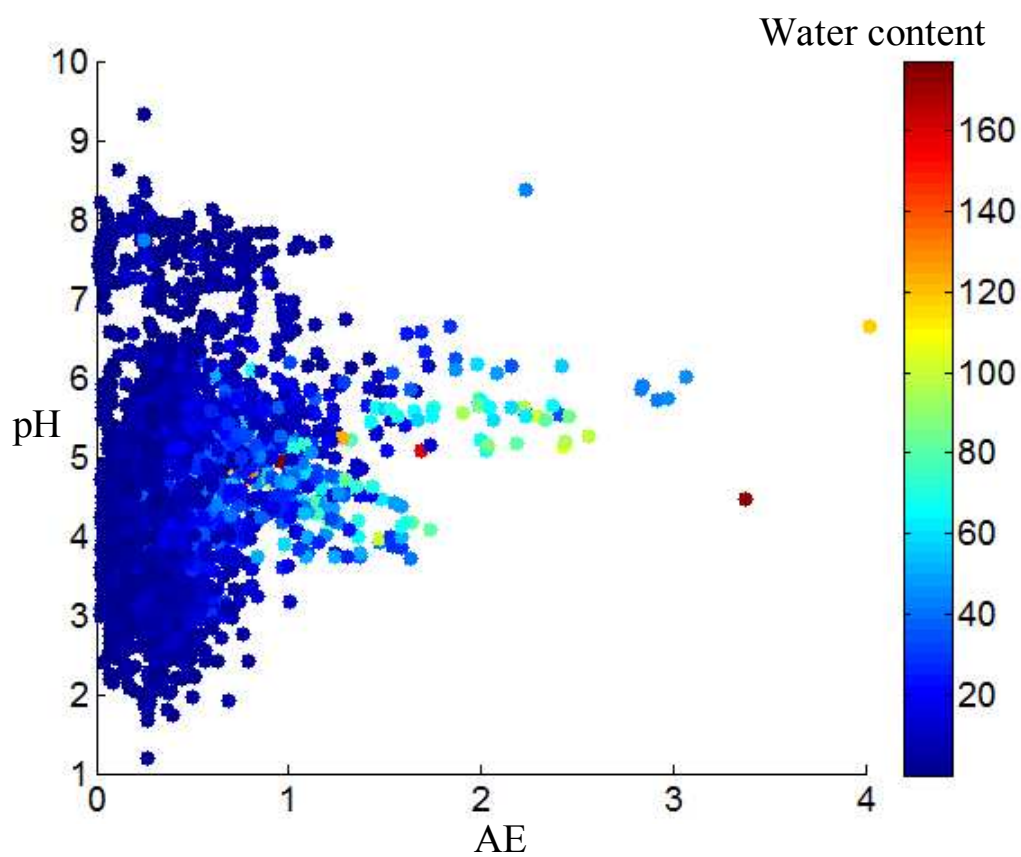

**Figure S11.** AE (mol m<sup>-3</sup>) vs. pH, with colored bar water content (μg m<sup>-3</sup>), calculated by ISORROPIA

II.

1 **Table S1. Concentrations of WS-ions during the sampling period (  $\mu\text{g m}^{-3}$  )**  
2

| Species            | Whole period | Heating period | Non-heating<br>period |
|--------------------|--------------|----------------|-----------------------|
| $\text{NO}_3^-$    | 10.7         | 13.5           | 7.6                   |
| $\text{SO}_4^{2-}$ | 8.9          | 10.2           | 7.4                   |
| $\text{Cl}^-$      | 3.5          | 4.9            | 2.0                   |
| $\text{F}^-$       | 0.9          | 1.1            | 0.7                   |
| $\text{NH}_4^+$    | 6.9          | 8.7            | 4.8                   |
| $\text{K}^+$       | 1.3          | 1.6            | 1.0                   |
| $\text{Na}^+$      | 0.9          | 1.1            | 0.8                   |
| $\text{Ca}^{2+}$   | 0.5          | 0.6            | 0.4                   |
| $\text{Mg}^{2+}$   | 0.1          | 0.2            | 0.1                   |

3  
4  
5

1 **Table S2. Regression information for AE and CE against source contributions**  
2 **( $\mu\text{g m}^{-3}$ ).**  
3

|                      | <b>AE</b>           |                                  | <b>CE</b>           |                                  |
|----------------------|---------------------|----------------------------------|---------------------|----------------------------------|
|                      | <i>Coefficients</i> | <i>Standardized Coefficients</i> | <i>Coefficients</i> | <i>Standardized Coefficients</i> |
| Constant             | -0.036              | 0.0050                           | 0.074               | 0.0080                           |
| <b>Coal</b>          | 0.017               | 0.00041                          | 0.018               | 0.00065                          |
| <b>Dust</b>          | 0.010               | 0.0011                           | 0.012               | 0.0017                           |
| <b>Vehicle</b>       | 0.017               | 0.00089                          | 0.0044              | 0.0014                           |
| <b>SN</b>            | 0.014               | 0.00020                          | 0.0068              | 0.00032                          |
| <b>SS</b>            | 0.012               | 0.00024                          | 0.018               | 0.00038                          |
| <b>R<sup>2</sup></b> | 0.93                |                                  | 0.80                |                                  |

4 SN: Secondary Nitrate; SS: Secondary Sulfate.  
5 All Coefficients are significant at the 99% confidence level.

1 **Table S3. Regression information for Neutralization ratio  $R_{neutral}$  against source**  
2 **contributions ( $\mu\text{g m}^{-3}$ ).**

|                      | $R_{neutral}$       |                                  |
|----------------------|---------------------|----------------------------------|
|                      | <i>Coefficients</i> | <i>Standardized Coefficients</i> |
| Constant             | 1.95                | 0.099                            |
| <b>Coal</b>          | 0.064               | 0.0081                           |
| <b>Dust</b>          | 0.051               | 0.021                            |
| <b>Vehicle</b>       | -0.093              | 0.018                            |
| <b>SN</b>            | -0.037              | 0.0039                           |
| <b>SS</b>            | 0.00047             | 0.0047                           |
| <b>R<sup>2</sup></b> | 0.055               |                                  |

4 SN: Secondary Nitrate;

5 SS: Secondary Sulfate

6 All Coefficients are significant at the 99% confidence level.

7

**Table S4. Regression information for  $\Delta\text{pH}$ , pH and  $10^{\text{pH}}$  against source contribution ( $\mu\text{g m}^{-3}$ ).**

| (A)                  | $\Delta\text{pH}$   |                                  |
|----------------------|---------------------|----------------------------------|
|                      | <i>Coefficients</i> | <i>Standardized Coefficients</i> |
| Constant             | 0.10                | 0.045                            |
| <b>Coal</b>          | 0.051               | 0.0037                           |
| <b>Dust</b>          | 0.095               | 0.0096                           |
| <b>Vehicle</b>       | -0.070              | 0.0081                           |
| <b>SN</b>            | -0.0038             | 0.0018                           |
| <b>SS</b>            | -0.032              | 0.0022                           |
| <b>R<sup>2</sup></b> | 0.16                |                                  |

| (B)                  | pH                  |                                  |
|----------------------|---------------------|----------------------------------|
|                      | <i>Coefficients</i> | <i>Standardized Coefficients</i> |
| Constant             | 4.59                | 0.059                            |
| <b>Coal</b>          | 0.063               | 0.0048                           |
| <b>Dust</b>          | 0.072               | 0.012                            |
| <b>Vehicle</b>       | -0.0078             | 0.010                            |
| <b>SN</b>            | 0.0079              | 0.0023                           |
| <b>SS</b>            | -0.043              | 0.0028                           |
| <b>R<sup>2</sup></b> | 0.13                |                                  |

| (C)                  | $10^{\text{pH}}$     |                                  |
|----------------------|----------------------|----------------------------------|
|                      | <i>Coefficients</i>  | <i>Standardized Coefficients</i> |
| Constant             | $2.3 \times 10^{10}$ | $3.4 \times 10^{10}$             |
| <b>Coal</b>          | $-1.2 \times 10^9$   | $2.9 \times 10^9$                |
| <b>Dust</b>          | $7.5 \times 10^8$    | $7.4 \times 10^9$                |
| <b>Vehicle</b>       | $1.7 \times 10^9$    | $6.2 \times 10^9$                |
| <b>SN</b>            | $-2.0 \times 10^8$   | $1.4 \times 10^9$                |
| <b>SS</b>            | $-8.3 \times 10^8$   | $1.7 \times 10^9$                |
| <b>R<sup>2</sup></b> | 0.00036              |                                  |

SN: Secondary Nitrate

SS: Secondary Sulfate

All Coefficients are significant at the 99% confidence level.

## References

1. Zhang, T.; Cao, J. J.; Tie, X. X.; Shen, Z. X.; Liu, S. X.; Ding, H.; Han, Y. M.; Wang, G. H.; Ho, K. F.; Qiang, J.; Li, W. T. Water-soluble ions in atmospheric aerosols measured in Xi'an, China: seasonal variations and sources. *Atmos. Res.* **2011**, *102*, 110-119.
2. Eddingsaas, N. C.; VanderVelde, D. G.; Wennberg, P. O. Kinetics and products of the acid-catalyzed ring-opening of atmospherically relevant butyl epoxy alcohols. *J. Phys. Chem. A* **114**, 8106-8113 (2010).
3. Sandford, R. C.; Exenberger, A.; Worsfold, P. J. Nitrogen cycling in natural waters using in situ, reagentless UV spectrophotometry with simultaneous determination of nitrate and nitrite. *Environ. Sci. Technol.* **2007**, *41*, 8420-8425.
4. Wang, W.; Liu, H.; Yue, X.; Li, H.; Chen, J.; Ren, L.; Tang, D.; Hatakeyama, S.; Takami, A. Study on acidity and acidic buffering capacity of particulate matter over Chinese eastern coastal areas in spring. *J. Geophys. Res.* **2006**, *111*, 4321-4344.
5. Liggio, J.; Li, S. M.; McLaren, R. Heterogeneous reactions of glyoxal on particulate matter: Identification of acetals and sulfate esters. *Environ. Sci. Technol.* **2005**, *39*, 1532-1541.
6. Tsai, J. H.; Chang, L. P.; Chiang, H. L. Airborne pollutant characteristics in an urban, industrial and agricultural complex metroplex with high emission loading and ammonia concentration. *Sci. Total Environ.* **2014**, *494-495*, 74-83.
7. Liu, S.; Hu, M.; Slanina, S.; He, L. Y.; Niu, Y. W.; Bruegemann, E.; Gnauk, Thomas.; Herrmann, Hartmut. Size distribution and source analysis of ionic compositions of aerosols in polluted periods at Xinken in Pearl River Delta (PRD) of China. *Atmos. Environ.* **2008**, *42*, 6284-6295.
8. Shi, G. L.; Liu, G. R.; Tian, Y. Z.; Zhou, X. Y.; Peng, X.; Feng, Y. C. Chemical characteristic and toxicity assessment of particle associated PAHs for the short-term anthropogenic activity event: During the Chinese New Year's Festival in 2013. *Sci. Total Environ.* **2014**, *8-14*, 482-483.
9. Hopke, P. K. Receptor Modeling in Environmental Chemistry. *John Wiley*. 1985.
10. Huang, X.; Qiu, R.; Chan, C.K.; Ravi Kant, P. Evidence of high PM<sub>2.5</sub> strong



- 1 acidity in ammonia-rich atmosphere of Guangzhou, China: transition in pathways  
2 of ambient ammonia to form aerosol ammonium at  $[\text{NH}_4^+]/[\text{SO}_4^{2-}] = 1.5$ . *Atmos.*  
3 *Res.* **2011**, *99*, 488-495.
- 4 11. Voutsas, D.; Samara, C.; Manoli, E.; Manoli, E.; Lazarou, D.; Tzoumaka, P. Ionic  
5 composition of PM<sub>2.5</sub> at urban sites of northern Greece: secondary inorganic  
6 aerosol formation. *Environ. Sci. Poll. Res.* **2014**, *21*, 4995-5006.
- 7 12. Gieré, R.; Smith, K.; Blackford, M. Chemical composition of fuels and emissions  
8 from a coal + tire combustion experiment in a power station. *Fuel.* **2006**, *85*,  
9 2278-2285.
- 10 13. Nyambura, M. G.; Mugera, G. W.; Felicia, P. L.; Gathuraa, N. P. Carbonation of  
11 brine impacted fractionated coal fly ash: implications for CO<sub>2</sub> sequestration. *J.*  
12 *Environ. Manage.* **2011**, *92*, 655-664.
- 13 14. Pant, P.; Harrison, R. M. Critical review of receptor modelling for particulate  
14 matter: A case study of India. *Atmos. Environ.* **2012**, *49*, 1-12.
- 15 15. Song, Y.; Xie, S.; Zhang, Y.; Zeng, L.; Salmon, L.G.; Zheng, M. Source  
16 apportionment of PM<sub>2.5</sub> in Beijing using principal component analysis/absolute  
17 principal component scores and UNMIX. *Sci. Total Environ.* **2006**, *372*, 278-86.
- 18 16. Li, L.; Li, M.; Huang, Z. X.; Gao, W.; Nian, H. Q.; Fu, Z.; Gao, J.; Chai, F. H.;  
19 Zhou, Z. Ambient particle characterization by single particle aerosol mass  
20 spectrometry in an urban area of Beijing. *Atmos. Environ.* **2014**, *94*, 323-331.
- 21 17. Mooibroek, D.; Schaap, M.; Weijers, E. P.; Hoogerbrugge, R. Source  
22 apportionment and spatial variability of PM<sub>2.5</sub> using measurements at five sites in  
23 the Netherlands. *Atmos. Environ.* **2011**, *45*(25): 4180-4191.
- 24 18. Bureau, Tianjin. Tianjin Statistical Yearbook (2015).
- 25 19. Maier, M. L.; Balachandran, S.; Sarnat, S. E.; Turner, J. R.; Mulholland, J. A.;  
26 Russell, A. G. Application of an Ensemble-Trained Source Apportionment  
27 Approach at a Site Impacted by Multiple Point Sources. *Environ. Sci. Technol.*  
28 **2013**, *47*, 3743-3751.
- 29 20. Charron, A.; Degrendele, C.; Laongsri, B.; Harrison, R.M. Receptor modelling of  
30 secondary and carbonaceous particulate matter at a southern UK site. *Atmos.*  
31 *Chem. Phys.* **2013**, *13*, 1879-1894.
- 32 21. Marmur, A.; Unal, A.; Mulholland, J. A.; Russell, A. G. Optimization-based

- 1 source apportionment of PM<sub>2.5</sub> incorporating gas-to-particle ratios. *Environ. Sci.*  
2 *Technol.* **2005**, 39, 3245-3254.
- 3 22. Cheng, H.; Gong, W.; Wang, Z.; Zhang, F.; Wang, X.; Lv, X.; Fu, X.; Liu, J.;  
4 Zhang, G. Ionic composition of submicron particles (PM<sub>1.0</sub>) during the  
5 long-lasting haze period in January 2013 in Wuhan, central China. *J. Environ. Sci.*  
6 **2014**, 26, 810-817.
- 7 23. Kerminen, V. M.; Hillamo, R.; Teinila, K.; Pakkanen, T.; Allegrini, I.; Sparapani,  
8 R. Ion balances of size-resolved tropospheric aerosol samples: implications for  
9 the acidity and atmospheric processing of aerosols. *Atmos. Environ.* **2001**, 35,  
10 5255-5265.  
11
